# Supplementary material for: Plastome data reveal multiple geographic origins of Quercus Group Ilex
Source: PeerJ. 2016 Apr 21;4:e1897. doi: 10.7717/peerj.1897 (PMC4846808; doi:10.7717/peerj.1897)
Supplement: File S1 [file peerj-04-1897-s001.xlsx]

## Sheet: Readme!
	Plastome data reveal multiple geographic origins of Quercus Group Ilex
	Marco Cosimo Simeone1,*, Guido W. Grimm2, Alessio Papini3, Federico Vessella1, Simone Cardoni1, Enrico Tordoni4, Roberta Piredda5, Alain Franc6,7, Thomas Denk8
	1 = Department of Agricultural and Forestry Science (DAFNE), Università degliStudi della Tuscia, via S. Camillo deLellis, 01100 Viterbo, Italy
	2 = Department of Palaeontology, University of Vienna, Althanstrasse 14 (UZA II), 1090 Wien, Austria
	3 =Dipartimento di BiologiaVegetale, Università degli studi di Firenze, via La Pira 4, 50121 Firenze, Italy
	4 =Department of Life Science, Università degli studi di Trieste, via L. Giorgieri 10, 34127 Trieste, Italy
	5 =Stazione Zoologica Anton Dohrn, Villa Comunale, 8012 Napoli, Italy
	6 = INRA, UMR BIOGECO-1202, 69 route d’Arcachon, F-33612 Cestas, France
	7 = Université Bordeaux, UMR BIOGECO-1202, Avenue des Facultés, F-33405 Talence, France
	8= Department of Palaeobiology, Swedish Museum of Natural History, Box 50007, 10405 Stockholm, Sweden
	Corresponding Author
	Marco Cosimo Simeone
	mcsimeone@unitus.it
File S1. List of specimens and accessions included in this study
This file includes a list of all specimens including the following information. An overview is provided in form of a Pivot-table.
Accession	Sequence label as found in the raw tree and network files (see subfolders MJ, ML)
Species	Species; background colour refers to colour used in Median Joining networks (in-text Fig. 2; File S3)
Group	Infrageneric Quercus group; following the concept of Denk & Grimm (2010)
Major clade/grade	Phylogenetic placement of sequence in the ML tree (cf. in-text fig. 1) based on the concatenated data
Subclade/-grade
rbcL (partial)	Haplotypes based on different data sets (see File S3 for some graphical enhanced MJ networks based on these haplotypes; see subfolder MJ for raw data and results)
matK (partial)
trnK intron (partial)
matK/trnK combined
trnH-psbA (no gaps)
trnH-psbA (with gaps)
Habit	Mode of leaf shedding
Region	Provenance of material, generalised
Collection site - Voucher	Voucher information
trnH-psbA Acc. #	Gene bank accession numbers
rbcL Acc. #
trnK-matK Acc. #

## Sheet: Overview
Number of Accessions	Clades/grades
Taxonomy	New World Oaks	Ilex 1 (Euro-Med)	Ilex 2 (WAHEA)	[isolated]	Cerris-Ilex	Cyclobalanopsis-Ilex	Eurasian Castaneoids	Gesamtergebnis
Cyclobalanopsis			1			10		11
Ilex		37	19	1	14	11		82
Cerris					7			7
Lobatae	8							8
Protobalanus	10							10
Quercus	13							13
Quercus-Virentes	7							7
Other Fagaceae	2						2	4
Gesamtergebnis	40	37	20	1	21	21	2	142

## Sheet: List
					Haplotypes
Accession	Species	Group	Major clade/grade	Subclade/-grade	rbcL	matK	3' trnK intron	matK/trnK combined	trnH-psbA (excl. gappy portions)	Habit	Region	Collection site - Voucher	trnH-psbA Acc. #	rbcL Acc. #	trnK-matK Acc. #
Castanea	Castanea mollissima	Other Fagaceae	Eurasian Castaneoids	[N/A]	HT 25	HT 25	HT 01	HT 47	HT 35	Deciduous	Asia	n.d. - Complete plastid genome sequence	HQ336406	HQ336406	HQ336406
Castanopsis	Castanopsis fissa	Other Fagaceae	Eurasian Castaneoids	[N/A]	HT 26	HT 07	HT 32	HT 48	HT 36	Evergreen	Asia	China/China/n.d.	JN044213	JF941179	FJ185053
Chrysolepis	Chrysolepis chrysophylla	Other Fagaceae	New World Oaks	(Western) N.American Castaneoids	HT 27	HT 10	HT 33	HT 49	HT 37	Evergreen	USA	R Bot G Edinburgh E-19693777	LM652864	LM652969	LM652880
Lithocarpus	Notholithocarpus densiflorus	Other Fagaceae	New World Oaks	(Western) N.American Castaneoids	HT 28	HT 10	HT 33	HT 49	HT 15	Evergrenn	USA	R Bot G Edinburgh E-19687759	LM652863	LM652970	LM652879
Qacut	Q. acuta	Cyclobalanopsis	Cyclobalanopsis-Ilex	Cyclobalanopsis subclade	HT 07	HT 09	HT 12	HT 21	HT 13	Evergreen	S Korea	Bot.G. HILL - 1981.2098	LM652857	LM652971	LM652886
Qafar	Q. afares	Cerris	Cerris-Ilex	Cerris-Ilex s.str.	HT 17	HT 02	HT 01	HT 02	HT 09	Deciduous	Tunisia	Bot.G. HILL - 1977.2243	HE591319	LM652972	HE583719
Qagri	Q. agrifolia	Lobatae	New World Oaks	Lobatae	HT 21	HT 15	HT 25	HT 38	HT 20	Evergreen	USA (California)	Nat B Gard Be (Meise) - BR 19812642	LM652856	LM652973	LM652873
Qalbe	Q. alba	Quercus	New World Oaks	Eastern N. American-Quercus	HT 14	HT 15	HT 23	HT 20	HT 20	Deciduous	USA (Illinois)	Nat B Gard Be (Meise) - BR 20001401-01	LM652853	LM652974	LM652870
Qaln1	Q. alnifolia	Ilex	Ilex 2 (WAHEA)	Eastern Mediterranean	HT 01	HT 01	HT 01	HT 01	HT 01	Evergreen	Cyprus	Wild – TUS BCD Qaln1	HE591298	LM653098	HE583655
Qaln2	Q. alnifolia	Ilex	Ilex 2 (WAHEA)	Eastern Mediterranean	HT 01	HT 01	HT 01	HT 01	HT 01	Evergreen	Cyprus	Wild, Kionia - TUS BCD Qaln2	LM652764	LM653039	LM652922
Qaln3	Q. alnifolia	Ilex	Ilex 2 (WAHEA)	Eastern Mediterranean	HT 01	HT 01	HT 01	HT 01	HT 02	Evergreen	Cyprus	Wild, Kikkos - TUS BCD Aln3	LM652765	LM653040	LM652923
Qau1	Q. aucheri	Ilex	Ilex 2 (WAHEA)	Eastern Mediterranean	HT 02	HT 01	HT 01	HT 01	HT 03	Evergreen	S-W Turkey	Bot.G. HILL - 1999.0376 (Marmaris)	HE591315	LM652975	HE583715
Qau2	Q. aucheri	Ilex	Ilex 2 (WAHEA)	Eastern Mediterranean	HT 02	HT 01	HT 01	HT 01	HT 03	Evergreen	S-W Turkey	Wild, Kumluca Denk & Grimm 2006319 S	LM652809	LM652976	LM652911
Qau3	Q. aucheri	Ilex	Ilex 2 (WAHEA)	Eastern Mediterranean	HT 02	HT 01	HT 01	HT 01	HT 03	Evergreen	S-W Turkey	Wild, Kozagaci - Denk & Grimm 2006323 S	LM652810	LM652977	LM652912
Qau4	Q. aucheri	Ilex	Ilex 2 (WAHEA)	Eastern Mediterranean	HT 02	HT 01	HT 01	HT 01	HT 03	Evergreen	W Turkey	Wild, Turgutreis - Denk & Grimm 2006326S	LM652811	LM652978	LM652913
Qau5	Q. aucheri	Ilex	Cerris-Ilex	Cerris-Ilex s.str.	HT 03	HT 02	HT 01	HT 02	HT 04	Evergreen	W Turkey	Wild, Soke - Denk & Grimm 2006330 S	LM652812	LM652979	LM652910
Qoot1	Q. baloot	Ilex	Ilex 2 (WAHEA)	Asian-Himalayan	HT 01	HT 01	HT 01	HT 01	HT 01	Evergreen	Pakistan	Bot.G. HILL - 1995.1206	HE591334	LM652981	HE583734
Qoot2	Q. baloot	Ilex	Ilex 2 (WAHEA)	Asian-Himalayan	HT 01	HT 01	HT 13	HT 22	HT 01	Evergreen	Afghanistan	Wild, Aitchison 22:128:25:87 S	LM652835	LM652980	LM652868
Qbaro	Q. baroni	Ilex	[isolated]	[N/A]	HT 15	HT 16	HT 14	HT 23	HT 21	Semievergreen	China	Morton Arboretum - TUS BCD Qbar	LM652806	LM653041	LM652924
Qberb1	Q. berberidifolia	Quercus	New World Oaks	Eastern N. American-Quercus	HT 21	HT 21	HT 23	HT 39	HT 20	(Semi-)Evergreen	USA (California)	Bot.G. HILL 1976.3542	LM652858	LM652982	LM652883
Qberb2	Q. berberidifolia	Quercus	New World Oaks	Eastern N. American-Quercus	HT 21	HT 15	HT 23	HT 20	HT 20	(Semi-)Evergreen	n.d. [species restr. to California]	Bot.G. HILL 1997.0371	LM652859	LM652983	LM652892
Qbic	Q. bicolor	Quercus	New World Oaks	Eastern N. American-Quercus	HT 14	HT 15	HT 23	HT 20	HT 20	Deciduous	USA (Michigan)	Nat B Gard Be (Meise) - BR 20061066-11	LM652854	LM652984	LM652871
Qcf	Q. castaneifolia	Cerris	Cerris-Ilex	Cerris-Ilex s.str.	HT 03	HT 02	HT 01	HT 02	HT 09	Deciduous	n.d. [species restricted to the Caucasian region]aucasus	Nat B Gard Be (Meise) - BR 20040124-21	HE591322	LM652985	HE583722
Qcedr	Q. cedrosensis	Protobalanus	New World Oaks	Western N. American Protobalanus-Quercus	HT 10	HT 10	HT 07	HT 13	HT 15	Evergreen	Mexico	UC Botanical Garden, Berkeley - 83-1155	LM652795	LM653042	LM652925
Qcerr	Q. cerris	Cerris	Cerris-Ilex	Cerris-Ilex s.str.	HT 24	HT 02	HT 01	HT 02	HT 09	Deciduous	C-S Italy	Wild, Stigliano - TUS BCD Qcer-Basilicata	HE591248	FN675722	HE583605
Qchrys1	Q. chrysolepis	Protobalanus	New World Oaks	Western N. American Protobalanus-Quercus	HT 05	HT 16	HT 15	HT 24	HT 22	Evergreen	USA (California)	Bot.G. HILL 1986.2429	HE611280	LM652986	HE611285
Qchrys2	Q. chrysolepis	Protobalanus	New World Oaks	Western N. American Protobalanus-Quercus	HT 05	HT 16	HT 15	HT 24	HT 23	Evergreen	USA (California)	Bot.G HILL - 1976.4377	LM652836	LM652987	LM652884
Qchrys3	Q. chrysolepis	Protobalanus	New World Oaks	Western N. American Protobalanus-Quercus	HT 05	HT 16	HT 15	HT 24	HT 23	Evergreen	USA (California)	Bot.G. HILL - 1977.5591	LM652837	LM652988	LM652885
Qcoc1	Q. coccifera	Ilex	Ilex 1 (Euro-Med)	[N/A]	HT 04	HT 03	HT 01	HT 03	HT 05	Evergreen	S-E Italy	Wild, Apulia - TUS BCD Qcoc1	HE591261	FN675713	HE583618
Qcoc2	Q. coccifera	Ilex	Ilex 1 (Euro-Med)	[N/A]	HT 05	HT 04	HT 01	HT 04	HT 06	Evergreen	W Italy	Wild, Sardinia, Masainas - MCS Qcoc2	HE591264	FN675714	HE583621
Qcoc3	Q. coccifera	Ilex	Ilex 1 (Euro-Med)	[N/A]	HT 04	HT 03	HT 01	HT 03	HT 05	Evergreen	S Croatia	Wild, Dubrovnik - TUS BCD Qcoc3	HE591300	LM653044	HE583657
Qcoc4	Q. coccifera	Ilex	Ilex 2 (WAHEA)	Eastern Mediterranean	HT 02	HT 01	HT 01	HT 01	HT 03	Evergreen	C-W Turkey	Wild, Isparta - TUS BCD Qcoc4	HE591260	LM653060	HE583617
Qcoc5	Q. coccifera	Ilex	Ilex 1 (Euro-Med)	[N/A]	HT 05	HT 03	HT 02	HT 05	HT 07	Evergreen	S Portugal	Wild, Faro - TUS BCD Qcoc5	HE591262	LM653056	HE583619
Qcoc6	Q. coccifera	Ilex	Ilex 2 (WAHEA)	Eastern Mediterranean	HT 01	HT 01	HT 01	HT 01	HT 08	Evergreen	C Israel	Wild, Ein Karem - TUS BCD Qcoc6	HE591258	LM653052	HE583615
Qcoc7	Q. coccifera	Ilex	Ilex 2 (WAHEA)	Eastern Mediterranean	HT 02	HT 01	HT 01	HT 01	HT 03	Evergreen	Cyprus	Wild, Akamas - TUS BCD Qcoc7	LM652766	LM653045	LM652927
Qcoc8	Q. coccifera	Ilex	Ilex 1 (Euro-Med)	[N/A]	HT 05	HT 05	HT 01	HT 06	HT 06	Evergreen	S Italy	Wild, Sicily, Capo Rama - TUS BCD Qcoc8	LM652767	LM653054	LM652933
Qcoc9	Q. coccifera	Ilex	Ilex 1 (Euro-Med)	[N/A]	HT 04	HT 03	HT 01	HT 03	HT 05	Evergreen	C Greece	Wild, Vardousia - TUS BCD Qcoc9	LM652768	LM653051	LM652928
Qcoc10	Q. coccifera	Ilex	Ilex 2 (WAHEA)	Eastern Mediterranean	HT 02	HT 01	HT 01	HT 01	HT 03	Evergreen	Greece	Wild, Dodecannese islands, Rhodes - TUS BCD Qcoc10	LM652769	LM653050	LM652929
Qcoc11	Q. coccifera	Ilex	Ilex 1 (Euro-Med)	[N/A]	HT 06	HT 03	HT 02	HT 05	HT 05	Evergreen	Spain	Wild, Balearic islands, Mallorca, Calvià - TUS BCD Qcoc11	LM652770	LM653058	LM652935
Qcoc12	Q. coccifera	Ilex	Ilex 1 (Euro-Med)	[N/A]	HT 05	HT 03	HT 02	HT 05	HT 05	Evergreen	S-E France	Bot.G. HILL - 1999.0318 - Provence	LM652813	LM652992	LM652921
Qcoc13	Q. coccifera	Ilex	Ilex 1 (Euro-Med)	[N/A]	HT 04	HT 03	HT 01	HT 03	HT 05	Evergreen	Greece	Wild, Ionian islands, Corfu, Makrades - TUS BCD Qcoc13	LM652771	LM653047	LM652930
Qcoc14	Q. coccifera	Ilex	Cerris-Ilex	Cerris-Ilex s.str.	HT 05	HT 06	HT 01	HT 07	HT 09	Evergreen	Greece	Wild, Crete - TUS BCD Qcoc14	LM652772	LM653048	LM652926
Qcoc15	Q. coccifera	Ilex	Ilex 1 (Euro-Med)	[N/A]	HT 05	HT 03	HT 02	HT 05	HT 05	Evergreen	S Spain	Wild, Cordoba - TUS BCD Qcoc15	LM652773	LM653057	LM652936
Qcoc16	Q. coccifera	Ilex	Cerris-Ilex	Cerris-Ilex s.str.	HT 05	HT 02	HT 01	HT 02	HT 09	Evergreen	Greece	Wild, Aegean islands, Ikaria - TUS BCD Qcoc16	LM652774	LM653049	LM652931
Qcoc17	Q. coccifera	Ilex	Cerris-Ilex	Cerris-Ilex s.str.	HT 03	HT 02	HT 01	HT 02	HT 04	Evergreen	N-W Turkey	Wild, Malkara - Denk & Grimm 2006045 S	LM652814	LM652990	LM652914
Qcoc18	Q. coccifera	Ilex	Ilex 2 (WAHEA)	Eastern Mediterranean	HT 01	HT 01	HT 01	HT 01	HT 01	Evergreen	S Turkey	Wild, Pazarcik - Denk & Grimm 2006225 S	LM652815	LM652991	LM652915
Qcoc19	Q. coccifera	Ilex	Ilex 2 (WAHEA)	Eastern Mediterranean	HT 01	HT 01	HT 01	HT 01	HT 01	Evergreen	West Bank	Wild, Nablus - TUS BCD Qcoc19	LM652775	LM653055	LM652934
Qcoc20	Q. coccifera	Ilex	Cerris-Ilex	Cerris-Ilex s.str.	HT 03	HT 02	HT 01	HT 02	HT 09	Evergreen	N Turkey	Wild, Erbaa - Denk 796200 S	LM652816	LM652989	LM652876
Qcoc21	Q. coccifera	Ilex	Ilex 1 (Euro-Med)	[N/A]	HT 05	HT 03	HT 02	HT 05	HT 05	Evergreen	S Spain	Wild, Valencia - TUS BCD Qcoc21	LM652776	LM653059	LM652937
Qcoc22	Q. coccifera	Ilex	Cerris-Ilex	Cerris-Ilex s.str.	HT 03	HT 02	HT 01	HT 02	HT 09	Evergreen	Greece	Wild, Sporades islands, Alonyssos - TUS BCD Qcoc22	LM652777	LM653046	LM652932
Qcoc23	Q. coccifera	Ilex	Ilex 1 (Euro-Med)	[N/A]	HT 05	HT 05	HT 01	HT 06	HT 06	Evergreen	Algeria	Wild, Boumerdes - MCS Qcoc23	X	X	X
Qcoc23	Q. coccifera	Ilex	Ilex 1 (Euro-Med)	[N/A]	HT 05	HT 05	HT 01	HT 06	HT 06	Evergreen	Algeria	Wild - Boumerdes	LM652778	LM653043	LM652938
Qcoc24	Q. coccifera	Ilex	Ilex 2 (WAHEA)	Eastern Mediterranean	HT 01	HT 01	HT 01	HT 01	HT 08	Evergreen	N Israel	Wild, Mt.Tabor - TUS BCD Qcoc24	HE591259	LM653053	HE583616
Qcrass	Q. crassipes	Lobatae	New World Oaks	Lobatae	HT 11	HT 20	HT 08	HT 37	HT 31	Evergreen	Mexico	Nat B Gard Be (Meise) - BR 20101004-82	LM652855	LM652993	LM652872
Qdent	Q. dentata	Quercus	New World Oaks	Eurasian Quercus	HT 22	HT 22	HT 26	HT 40	HT 32	Deciduous	Japan	Nat B Gard Be (Meise) - BR 198107	HE591335	LM652994	HE583735
Qdol1	Q. dolicholepis	Ilex	Cyclobalanopsis-Ilex	Asian Ilex grade	HT 05	HT 07	HT 03	HT 08	HT 11	Evergreen	n.d.	Bot. G. Lyon - TUS BCD Qdol1	LM652866	LM653061	LM652939
Qdol2	Q. dolicholepis	Ilex	Cyclobalanopsis-Ilex	Asian Ilex grade	HT 05	HT 08	HT 04	HT 9	HT 11	Evergreen	China	Bot. G. HILL -1998.0367	LM652825	LM652995	LM652894
Qellip	Q. ellipsoidalis	Lobatae	New World Oaks	Lobatae	HT 11	HT 12	HT 08	HT 15	HT 17	Deciduous	USA (Michigan)	Nat B Gard Be (Meise) - BR20040129-26	LM652860	LM652996	LM652874
Qemor	Q. emoryi	Lobatae	New World Oaks	Lobatae	HT 23	HT 20	HT 08	HT 37	HT 31	Semievergreen	USA (Arizona)	Univ. Minnesota - AZHU 16	LM652799	LM653062	LM652940
Qengl	Q. engleriana	Ilex	Cerris-Ilex	Cerris-Ilex s.str.	HT 05	HT 02	HT 17	HT 26	HT 24	Evergreen	China	Domein Bokrijk - 20040460	LM652838	LM652997	LM652882
Qdil	Q. floribunda (≡ Q. dilatata)	Ilex	Ilex 2 (WAHEA)	Asian-Himalayan	HT 16	HT 01	HT 16	HT 25	HT 01	Evergreen	Pakistan	Bot. G. HILL - 1999.0004	HE591338	LM652998	HE583738
Qfran	Q. franchetii	Ilex	Cyclobalanopsis-Ilex	Asian Ilex grade	HT 05	HT 07	HT 04	HT 27	HT 11	Evergreen	n.d.	Bot. G. Lyon - TUS BCD Qfra	LM652865	LM653063	LM652941
Qfus	Q. fusiformis	Quercus-Virentes	New World Oaks	Virentes	HT 13	HT 10	HT 09	HT 18	HT 19	Evergreen	USA	Domein Bokrijk - 20050821	LM652861	LM652999	LM652881
Qgem	Q. geminata	Quercus-Virentes	New World Oaks	Eastern N. American-Quercus	HT 14	HT 15	HT 23	HT 20	HT 20	Evergreen	USA (Georgia)	Arboretum des Pouyouleix - 1575	LM652804	LM653064	LM652942
Qgil1	Q. gilva	Cyclobalanopsis	Cyclobalanopsis-Ilex	Cyclobalanopsis subclade	HT 07	HT 09	HT 04	HT 10	HT 12	Evergreen	Taiwan	Bot. G. Bonn - 31454	LM652826	LM653000	LM652907
Qgil2	Q. gilva	Cyclobalanopsis	Cyclobalanopsis-Ilex	Cyclobalanopsis subclade	HT 07	HT 09	HT 04	HT 10	HT 13	Evergreen	Japan	Bot. G. HILL - 2002.0032	LM652827	LM653001	LM652897
Qgla1	Q. glauca	Cyclobalanopsis	Cyclobalanopsis-Ilex	Cyclobalanopsis subclade	HT 17	HT 09	HT 01	HT 28	HT 25	Evergreen	n.d.	Bot.G.PA - TUS BCD Qgla1	HE611276	LM653065	HE611281
Qgla2	Q. glauca	Cyclobalanopsis	Cyclobalanopsis-Ilex	Cyclobalanopsis subclade	HT 07	HT 09	HT 04	HT 10	HT 13	Evergreen	Bhutan	Bot. G. HILL – 1985.0033	LM652839	LM653002	LM652899
Qgla3	Q. glauca	Cyclobalanopsis	Cyclobalanopsis-Ilex	Cyclobalanopsis subclade	HT 07	HT 09	HT 04	HT 10	HT 13	Evergreen	Taiwan	Bot. G. HILL -1996.0443	LM652840	LM653003	LM652891
Qgriff	Q. griffithii	Quercus	New World Oaks	Eurasian Quercus	HT 22	HT 22	HT 28	HT 42	HT 34	Deciduous	China	Bot.G. HILL - 1998.0412	HE591336	LM653004	HE583736
Qguya	Q. guyavaefolia	Ilex	Cyclobalanopsis-Ilex	Asian Ilex grade	HT 08	HT 07	HT 18	HT 29	HT 14	Evergreen	China	Bot. G. HILL - 1999.0287	LM652841	LM653005	LM652896
Qib	Q. iberica	Quercus	New World Oaks	Eurasian Quercus	HT 05	HT 22	HT 27	HT 41	HT 32	Deciduous	Iran	Bot. G. HILL - 1977.1311	HE591326	LM653006	HE583726
Qilex	Q. ilex	Ilex	Ilex 1 (Euro-Med)	[N/A]	HT 05	HT 04	HT 01	HT 04	HT 06	Evergreen	C Italy	Wild, Latium, Viterbo - TUS BCD Qile1	HE591265	FN675717	HE583622
Qilex2	Q. ilex	Ilex	Ilex 1 (Euro-Med)	[N/A]	HT 05	HT 05	HT 01	HT 06	HT 06	Evergreen	W Italy	Wild, Sardinia, Oliena - TUS BCD Qile2	HE591266	FN675718	HE583623
Qilex3	Q. ilex	Ilex	Ilex 1 (Euro-Med)	[N/A]	HT 05	HT 05	HT 01	HT 06	HT 06	Evergreen	N Croatia	Wild, Pula - TUS BCD Qile3	HE591302	LM653068	HE583659
Qilex4	Q. ilex	Ilex	Ilex 1 (Euro-Med)	[N/A]	HT 05	HT 05	HT 01	HT 06	HT 06	Evergreen	S-E Italy	Wild, Apulia - TUS BCD Qile4	HE591267	FN675719	HE583624
Qilex5	Q. ilex	Ilex	Ilex 1 (Euro-Med)	[N/A]	HT 05	HT 03	HT 02	HT 05	HT 05	Evergreen	N Morocco	Wild, Tangers - TUS BCD Qile5	HE591263	LM653079	HE583620
Qilex6	Q. ilex	Ilex	Ilex 1 (Euro-Med)	[N/A]	HT 05	HT 03	HT 02	HT 05	HT 05	Evergreen	N-W Spain	Wild, Ponferrada - TUS BCD Qile6	HE591299	LM653082	HE583656
Qilex8	Q. ilex	Ilex	Ilex 1 (Euro-Med)	[N/A]	HT 06	HT 03	HT 02	HT 05	HT 05	Evergreen	Spain	Wild, Balearic islands, Mallorca, Escorca - TUS BCD Qile8	LM652780	LM653081	LM652953
Qilex9	Q. ilex	Ilex	Ilex 1 (Euro-Med)	[N/A]	HT 05	HT 05	HT 01	HT 06	HT 06	Evergreen	S Italy	Wild , Sicily, Zafferana Etnea - TUS BCD Qile9	LM652781	LM653078	LM652952
Qilex10	Q. ilex	Ilex	Ilex 1 (Euro-Med)	[N/A]	HT 05	HT 04	HT 01	HT 04	HT 06	Evergreen	S France	Wild, Corse, Olmeto - TUS BCD Qile10	LM652782	LM653072	LM652944
Qilex11	Q. ilex	Ilex	Ilex 1 (Euro-Med)	[N/A]	HT 05	HT 05	HT 01	HT 06	HT 06	Evergreen	S-E France	Wild, Provence, Nice - TUS BCD Qile11	LM652783	LM653071	LM652945
Qilex12	Q. ilex	Ilex	Ilex 1 (Euro-Med)	[N/A]	HT 05	HT 03	HT 02	HT 05	HT 05	Evergreen	S France	Wild, Pyrenees, Rennes-le-Chateaux - TUS BCD Qile12	LM652784	LM653073	LM652946
Qilex13	Q. ilex	Ilex	Ilex 1 (Euro-Med)	[N/A]	HT 05	HT 03	HT 02	HT 05	HT 05	Evergreen	N-W Algeria	Wild, Mascara - TUS BCD Qile13	LM652785	LM653066	LM652955
Qilex14	Q. ilex	Ilex	Ilex 1 (Euro-Med)	[N/A]	HT 05	HT 03	HT 02	HT 05	HT 05	Evergreen	N-E Algeria	Wild, Souk Ahras - TUS BCD Qile14	LM652786	LM653067	LM652956
Qilex15	Q. ilex	Ilex	Ilex 1 (Euro-Med)	[N/A]	HT 05	HT 06	HT 01	HT 07	HT 05	Evergreen	Greece	Wild, Crete - TUS BCD Qile15	LM652787	LM653074	LM652948
Qilex16	Q. ilex	Ilex	Cerris-Ilex	Cerris-Ilex s.str.	HT 03	HT 02	HT 01	HT 02	HT 09	Evergreen	C Greece	Wild, Drymaia - TUS BCD Qile16	LM652788	LM653075	LM652949
Qilex17	Q. ilex	Ilex	Ilex 1 (Euro-Med)	[N/A]	HT 05	HT 04	HT 01	HT 04	HT 06	Evergreen	S Croatia	Wild, Kastela - TUS BCD Qile17	LM652789	LM653069	LM652943
Qilex18	Q. ilex	Ilex	Cerris-Ilex	Cerris-Ilex s.str.	HT 05	HT 02	HT 01	HT 02	HT 09	Evergreen	Greece	Wild, Aegean islands, Ikaria - TUS BCD Qile18	LM652790	LM653076	LM652950
Qilex19	Q. ilex	Ilex	Ilex 1 (Euro-Med)	[N/A]	HT 05	HT 04	HT 01	HT 04	HT 06	Evergreen	N Turkey	Wild, Kocaman Denk 796166 S	LM652818	LM653007	LM652916
Qilex20	Q. ilex	Ilex	Ilex 1 (Euro-Med)	[N/A]	HT 05	HT 04	HT 01	HT 04	HT 06	Evergreen	N-W Turkey	Wild, Eregli - Denk & Grimm 2006112 S	LM652819	LM653008	LM652917
Qilex21	Q. ilex	Ilex	Ilex 1 (Euro-Med)	[N/A]	HT 05	HT 03	HT 02	HT 05	HT 05	Evergreen	N-W Tunisia	Wild, Nebeur - Denk 2005-268 S	LM652820	LM653009	LM652909
Qilex22	Q. ilex	Ilex	Ilex 1 (Euro-Med)	[N/A]	HT 05	HT 03	HT 02	HT 05	HT 10	Evergreen	C-N Morocco	Wild, Azrou - Denk 2005-132 S	LM652821	LM653010	LM652918
Qilex23	Q. ilex	Ilex	Ilex 1 (Euro-Med)	[N/A]	HT 05	HT 03	HT 02	HT 05	HT 05	Evergreen	C Morocco	Wild, Tizi n‘test - Denk 2005-162 S	LM652822	LM653011	LM652919
Qilex24	Q. ilex	Ilex	Ilex 1 (Euro-Med)	[N/A]	HT 05	HT 03	HT 02	HT 05	HT 05	Evergreen	C-S Morocco	Wild, Tafraout - Denk 2005-153 S	LM652823	LM653012	LM652920
Qilex25	Q. ilex	Ilex	Cerris-Ilex	Cerris-Ilex s.str.	HT 03	HT 02	HT 01	HT 02	HT 09	Evergreen	Greece	Wild, Sporades islands, Skiathos - TUS BCD Qile25	LM652791	LM653077	LM652951
Qilex26	Q. ilex	Ilex	Ilex 1 (Euro-Med)	[N/A]	HT 05	HT 03	HT 02	HT 05	HT 05	Evergreen	W France	Wild, Aquitaine, Lacanau - TUS BCD Qile26	LM652792	LM653070	LM652947
Qilex27	Q. ilex	Ilex	Ilex 1 (Euro-Med)	[N/A]	HT 05	HT 03	HT 02	HT 05	HT 05	Evergreen	N Spain	Wild, Coll de Corniols (Isona) - TUS BCD Qile27	LM652779	LM653080	LM652954
Qilex28	Q. ilex	Ilex	Ilex 1 (Euro-Med)	[N/A]	HT 05	HT 03	HT 02	HT 05	HT 05	Evergreen	C Spain	Wild, Madrid - Denk Il-0403 S	LM652824	LM653013	LM652877
Qinc	Q. incana	Lobatae	New World Oaks	Lobatae	HT 11	HT 12	HT 08	HT 15	HT 17	Semievergreen	USA (Alabama)	Auburn University - TUS BCD Qinc	LM652808	LM653083	LM652957
Qleuco	Q. leucotrichophora (= Q. lanata)	Ilex	Ilex 2 (WAHEA)	Asian-Himalayan	HT 18	HT 01	HT 01	HT 01	HT 01	Evergreen	n.d.	Bot.G. Copenhagen - S1884-0674	LM652841	LM653014	LM652875
Qlib	Q. libani	Cerris	Cerris-Ilex	Cerris-Ilex s.str.	HT 05	HT 02	HT 01	HT 02	HT 30	Semievergreen/deciduous	Lebanon	Wild - TUS BCD Qlib	HE591294	LM653097	HE583651
Qlong	Q. longispica	Ilex	Cyclobalanopsis-Ilex	Asian Ilex grade	HT 05	HT 07	HT 18	HT 29	HT 26	Evergreen	China	Bot.G. HILL - 1984.2410	LM652843	LM653015	LM652888
Qmarc	Q. macrocarpa	Quercus	New World Oaks	Eastern N. American-Quercus	HT 14	HT 15	HT 24	HT 36	HT 20	Deciduous	n.d.	Bot.G. HILL - 1982.0341	HE611279	LM653016	HE611284
Qmin	Q. minima	Quercus-Virentes	New World Oaks	Virentes	HT 13	HT 10	HT 09	HT 18	HT 19	Evergreen	USA (Georgia)	Arboretum des Pouyouleix - 1378	LM652805	LM653084	LM652958
Qmoni	Q. monimotricha	Ilex	Cyclobalanopsis-Ilex	Asian Ilex grade	HT 08	HT 07	HT 05	HT 11	HT 14	Evergreen	China	Bot.G. HILL -1990.0250	LM652828	LM653017	LM652890
Qmyrt	Q. myrtifolia	Lobatae	New World Oaks	Lobatae	HT 11	HT 12	HT 08	HT 15	HT 33	Evergreen	USA (Florida)	Univ. Minnesota - FLMY 1	LM652798	LM653085	LM652959
Qole	Q. oleoides	Quercus-Virentes	New World Oaks	Virentes	HT 13	HT 10	HT 10	HT 19	HT 19	Evergreen	Mexico, Tampico	Univ. Minnesota - MXTP 3064	LM652797	LM653086	LM652960
Qoxy1	Q. oxyodon	Cyclobalanopsis	Cyclobalanopsis-Ilex	Cyclobalanopsis subclade	HT 07	HT 09	HT 04	HT 10	HT 13	Evergreen	China	High Beeches Bot. G. - 25606	LM652844	LM653019	LM652908
Qoxy2	Q. oxyodon	Cyclobalanopsis	Ilex 2 (WAHEA)	Asian-Himalayan	HT 19	HT 17	HT 19	HT 30	HT 27	Evergreen	China	Bot.G. HILL - 1989.1759	LM652845	LM653020	LM652889
Qoxy3	Q. oxyodon	Cyclobalanopsis	Cyclobalanopsis-Ilex	Cyclobalanopsis subclade	HT 07	HT 09	HT 04	HT 10	HT 13	Evergreen	China	R. Bot. G. Kew - K1985-4349	LM652846	LM653018	LM652901
Qpal1	Q. palmeri	Protobalanus	New World Oaks	Western N. American Protobalanus-Quercus	HT 10	HT 10	HT 07	HT 13	HT 15	Evergreen	USA (California)	Arnold Arboretum - 1941	LM652800	LM653087	LM652962
Qpal2	Q. palmeri	Protobalanus	New World Oaks	Western N. American Protobalanus-Quercus	HT 10	HT 11	HT 07	HT 14	HT 16	Evergreen	USA (California)	Rancho S. Ana - 8326	LM652830	LM653021	LM652906
Qpann	Q. pannosa (= Q. semecarpifolia)	Ilex	Cyclobalanopsis-Ilex	Asian Ilex grade	HT 09	HT 07	HT 06	HT 12	HT 14	Evergreen	China	Bot.G. HILL - 2003.0805	LM652829	LM653022	LM652898
Qphy1	Q. phillyreoides	Ilex	Cerris-Ilex	Japanese Ilex	HT 12	HT 13	HT 01	HT 16	HT 18	Evergreen	n.d.	Nat B Gard Be (Meise) - BR 20040122-19	HE591331	LM653024	HE583731
Qphy2	Q. phillyreoides	Ilex	Cerris-Ilex	Japanese Ilex	HT 12	HT 13	HT 01	HT 16	HT 18	Evergreen	Japan	R. Bot. G. Kew K1992-903	LM652831	LM653023	LM652900
Qphy3	Q. phillyreoides	Ilex	Cerris-Ilex	Japanese Ilex	HT 12	HT 13	HT 01	HT 16	HT 18	Evergreen	Japan	Wild, Matsuyama - TUS BCD Qphy3	LM652793	LM653088	LM652963
Qpon1	Q. pontica	Quercus	New World Oaks	Eurasian Quercus	HT 05	HT 23	HT 29	HT 43	HT 32	Deciduous	n.d. [species restricted to the Caucasian region]	Nat B Gard Be (Meise) - BR:19820429	HE591330	LM653025	HE583730
Qpon2	Q. pontica	Quercus	New World Oaks	Eurasian Quercus	HT 05	HT 23	HT 29	HT 43	HT 32	Deciduous	N-E Turkey	Wild - Denk & Grimm 2006-189	LM652862	LM653026	LM652878
Qpsse1	Q. pseudosemecarpifolia (= Q. rehderiana)	Ilex	Cyclobalanopsis-Ilex	Asian Ilex grade	HT 08	HT 07	HT 18	HT 29	HT 14	Evergreen	China	Bot. G. HILL - 1999.0291	HE591333	LM653028	HE583733
Qpsse2	Q. pseudosemecarpifolia (= Q. rehderiana)	Ilex	Cyclobalanopsis-Ilex	Asian Ilex grade	HT 05	HT 07	HT 20	HT 31	HT 14	Evergreen	China	R. Bot. G. Kew - K2004-1221	LM652847	LM653027	LM652902
Qpyr	Q. pyrenaica	Quercus	New World Oaks	Eurasian Quercus	HT 05	HT 22	HT 28	HT 42	HT 32	Deciduous	S France	Bot.G. HILL:1995.0551	HE591339	LM653029	HE612111
Qro	Q. robur	Quercus	New World Oaks	Eurasian Quercus	HT 17	HT 22	HT 30	HT 44	HT 32	Deciduous	C Italy	Wild, Latium - TUS BCD Qrob-Viterbo	HE591286	FN675733	HE583643
Qrub1	Q. rubra	Lobatae	New World Oaks	Lobatae	HT 11	HT 12	HT 08	HT 15	HT 17	Deciduous	n.d.	Bot.G. UNITUS - TUS BCD Qrubr	HE611277	FN689354	HE611282
Qrub2	Q. rubra	Lobatae	New World Oaks	Lobatae	HT 11	HT 12	HT 08	HT 15	HT 17	Deciduous	n.d.	Bot G. Warszaw - TUS BCD Qrubr2	LM652793	LM653089	LM652963
Qsadl	Q. sadleriana	Quercus	New World Oaks	Western N. American Protobalanus-Quercus	HT 05	HT 10	HT 15	HT 35	HT 23	Evergreen	USA (California)	Arboretum des Pouyouleix - 1398	LM652803	LM653090	LM652964
Qsal1	Q. salicina	Cyclobalanopsis	Cyclobalanopsis-Ilex	Cyclobalanopsis subclade	HT 07	HT 09	HT 04	HT 10	HT 28	Evergreen	Japan	Stichting Arboretum - 07141	LM652807	LM653091	LM652965
Qsal2	Q. salicina	Cyclobalanopsis	Cyclobalanopsis-Ilex	Cyclobalanopsis subclade	HT 07	HT 09	HT 04	HT 10	HT 28	Evergreen	Japan	Bot.G. HILL - 2002.0028	LM652848	LM653030	LM652887
Qseme1	Q. semecarpifolia	Ilex	Ilex 2 (WAHEA)	Asian-Himalayan	HT 20	HT 18	HT 21	HT 32	HT 01	Evergreen	China	Bot.G. HILL - 1976.0873	HE591332	LM653032	HE583732
Qseme2	Q. semecarpifolia	Ilex	Cyclobalanopsis-Ilex	Asian Ilex grade	HT 05	HT 09	HT 04	HT 10	HT 29	Evergreen	China	R. Bot. G. Kew - K1988-8817	LM652849	LM653031	LM652903
Qsene	Q. senescens	Ilex	Cyclobalanopsis-Ilex	Asian Ilex grade	HT 05	HT 07	HT 18	HT 29	HT 14	Evergreen	China	Bot.G. HILL -1998.0410	LM652850	LM653033	LM652895
Qspin	Q. spinosa	Ilex	Cerris-Ilex	Cerris-Ilex s.str.	HT 05	HT 19	HT 01	HT 33	HT 09	Evergreen	Taiwan	Nat B Gard Be (Meise) - BR 20061161-09	LM652851	LM653033	LM652869
Qsub1	Q. suber	Cerris	Cerris-Ilex	Cerris-Ilex s.str.	HT 24	HT 02	HT 01	HT 02	HT 09	Evergreen	C Italy	Wild, Latium - TUS BCD Qsub-Tuscania	HE591254	FN675727	HE583611
Qsub2	Q. suber	Cerris	Cerris-Ilex	Cerris-Ilex s.str.	HT 24	HT 24	HT 01	HT 45	HT 09	Evergreen	W France	Wild, Landes - TUS BCD Qsub-Seignosse	HE591296	LM653092	HE583653
Qtom1	Q. tomentella	Protobalanus	New World Oaks	Western N. American Protobalanus-Quercus	HT 10	HT 10	HT 07	HT 13	HT 15	Evergreen	USA (California)	Bot.G. HILL - 1997.04010	LM652832	LM653036	LM652893
Qtom2	Q. tomentella	Protobalanus	New World Oaks	Western N. American Protobalanus-Quercus	HT 10	HT 14	HT 07	HT 17	HT 15	Evergreen	USA (California)	Rancho S. Ana,12616	LM652833	LM653035	LM652867
Qvac1	Q. vacciniifolia	Protobalanus	New World Oaks	Western N. American Protobalanus-Quercus	HT 05	HT 16	HT 22	HT 34	HT 23	Evergreen	USA (California)	R. Bot. G. Kew - K2008-2023	LM652852	LM653037	LM652904
Qvac2	Q. vacciniifolia	Protobalanus	New World Oaks	Western N. American Protobalanus-Quercus	HT 17	HT 16	HT 15	HT 24	HT 23	Evergreen	n.d.	University of Washington - 540-66-B	LM652796	LM653093	LM652966
Qvar	Q. variabilis	Cerris	Cerris-Ilex	Cerris-Ilex s.str.	HT 11	HT 02	HT 31	HT 46	HT 09	Deciduous	S Korea	Wild - TUS BCD Qvar	HE585136	LM653096	HE585138
Qvir1	Q. virginiana	Quercus-Virentes	New World Oaks	Virentes	HT 13	HT 10	HT 09	HT 18	HT 19	Evergreen	USA (Florida)	Arnold Arboretum - 2001.216	LM652801	LM653095	LM652968
Qvir2	Q. virginiana	Quercus-Virentes	New World Oaks	Virentes	HT 13	HT 10	HT 10	HT 19	HT 19	Evergreen	n.d.	Arb. des Pouyouleix - 45	LM652802	LM653094	LM652967
Qvir3	Q. virginiana	Quercus-Virentes	New World Oaks	Eastern N. American-Quercus	HT 14	HT 15	HT 11	HT 20	HT 20	Evergreen	n.d.	Bot.G. Pisa - 1829/00001	LM652834	LM653038	LM652905
											TOT (outgroups included) = 63 species (141 individuals)
