# Supplementary material for: Plastome data reveal multiple geographic origins of Quercus Group Ilex
Source: PeerJ journal article supplement (doi:10.7717/peerj.1897), 2016-04-21

Supplement-fig. S3-1:  
Median-Joining network based on  
the amplified part of the *rbcl* gene

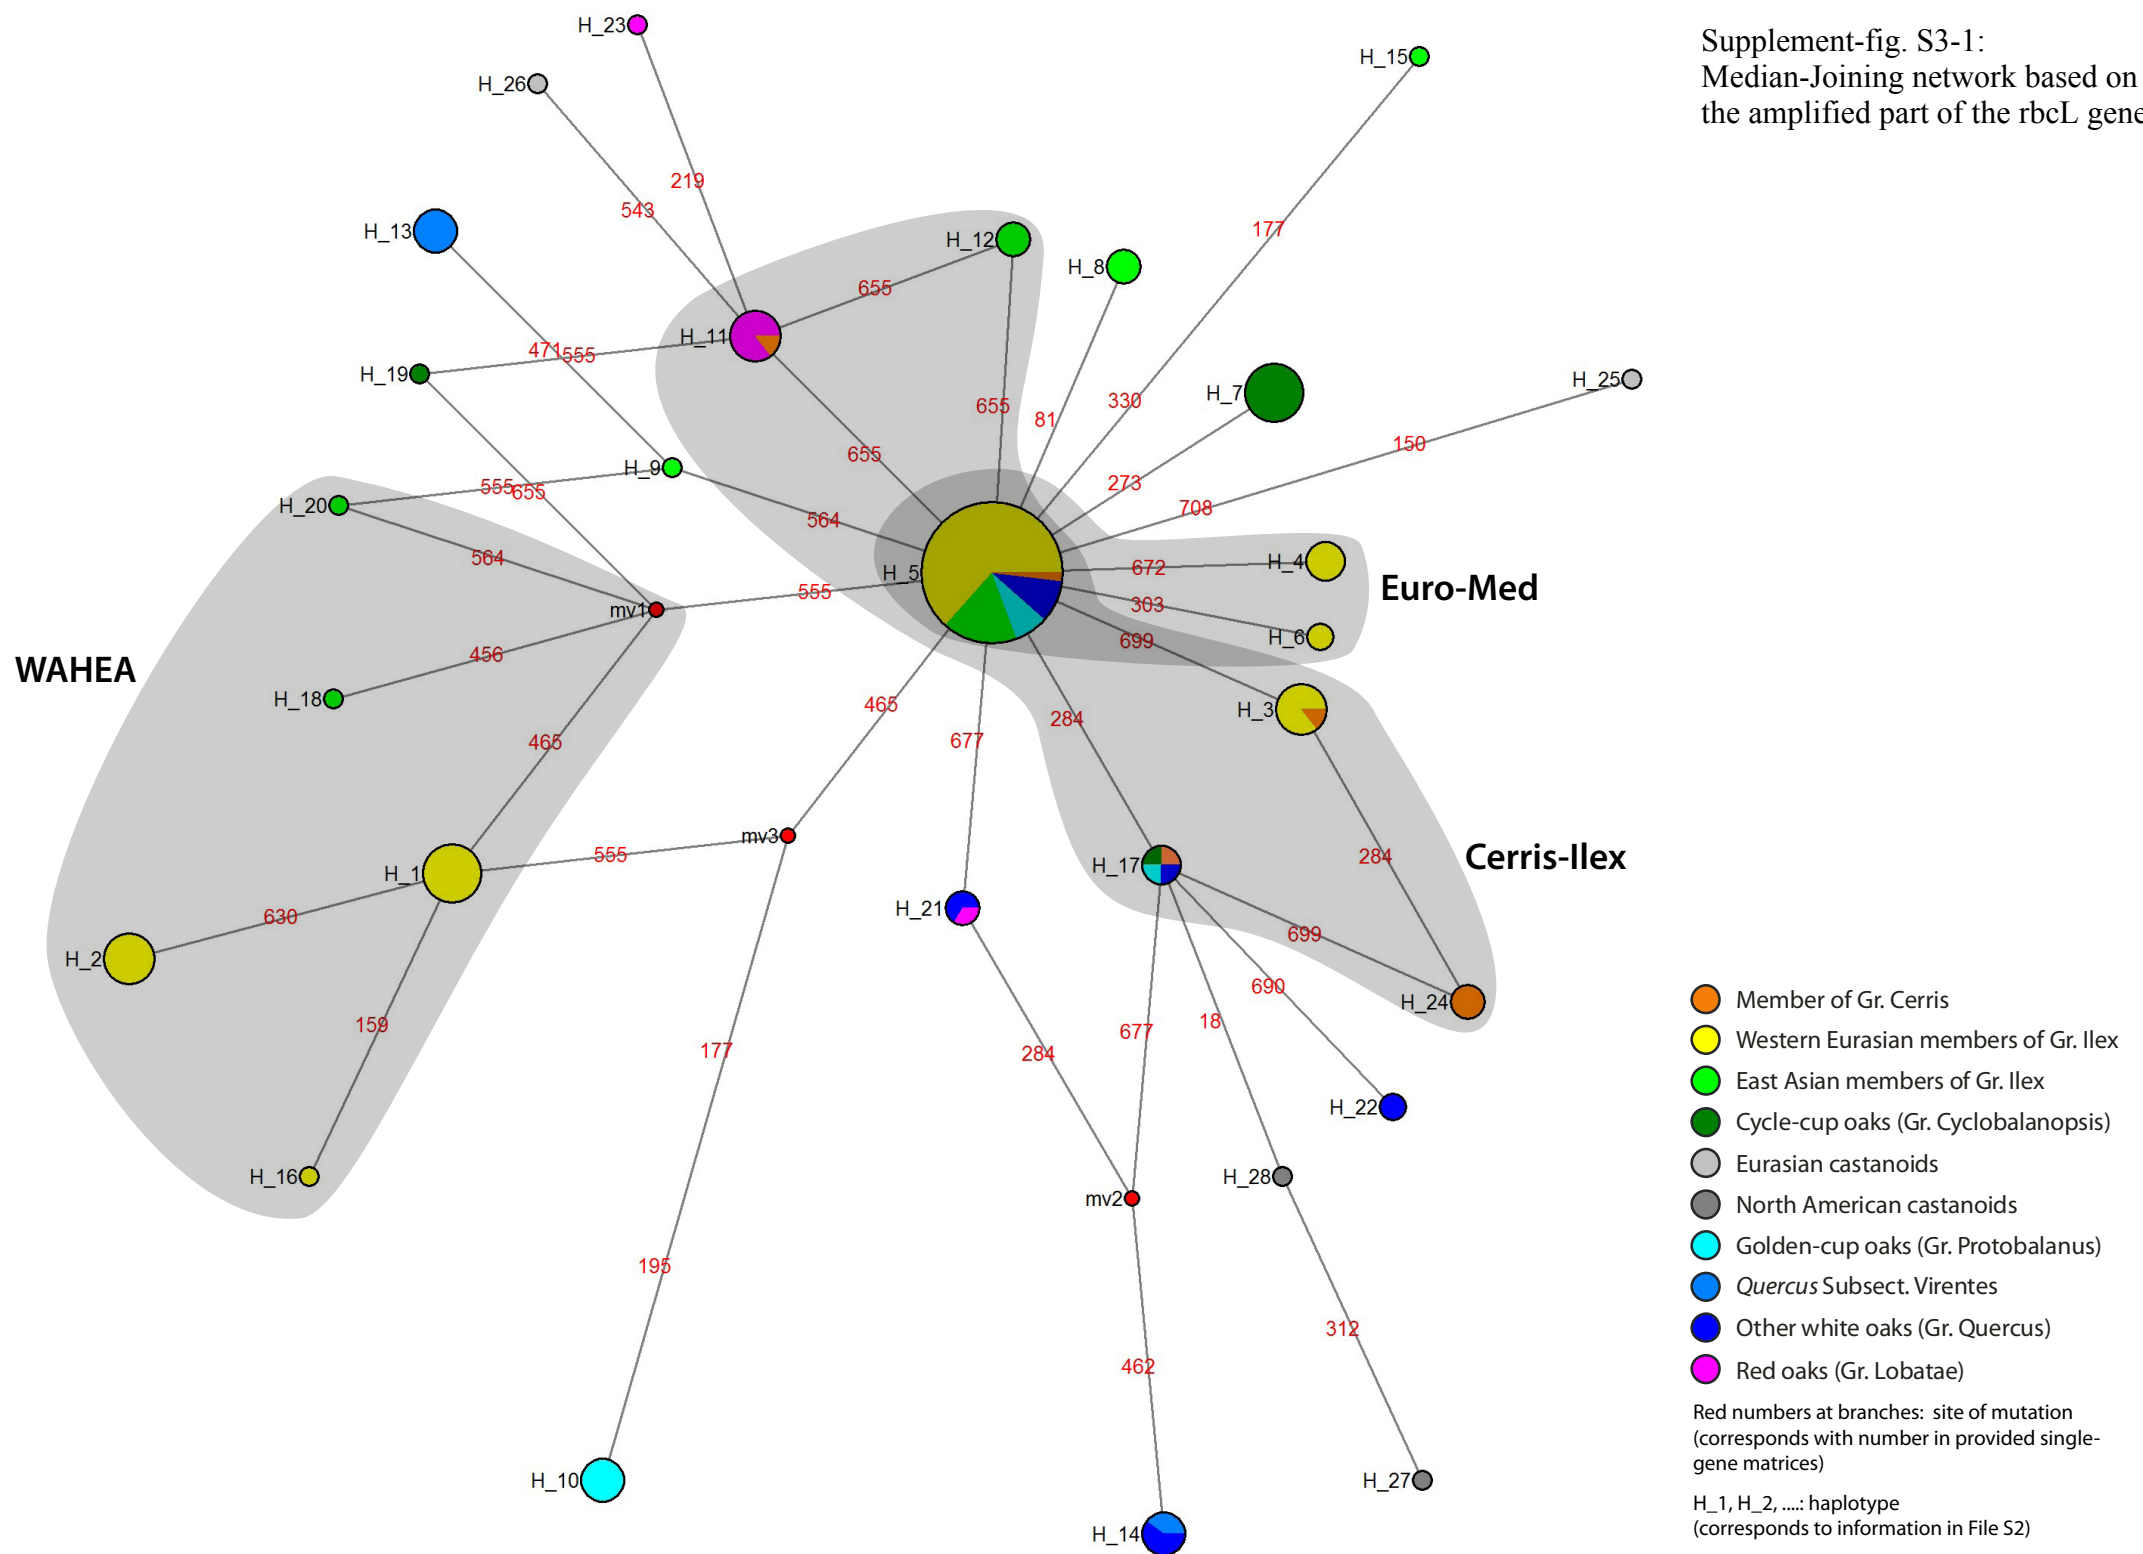

Supplement-fig. S3-2:  
Median-Joining network based on  
3' matK coding region

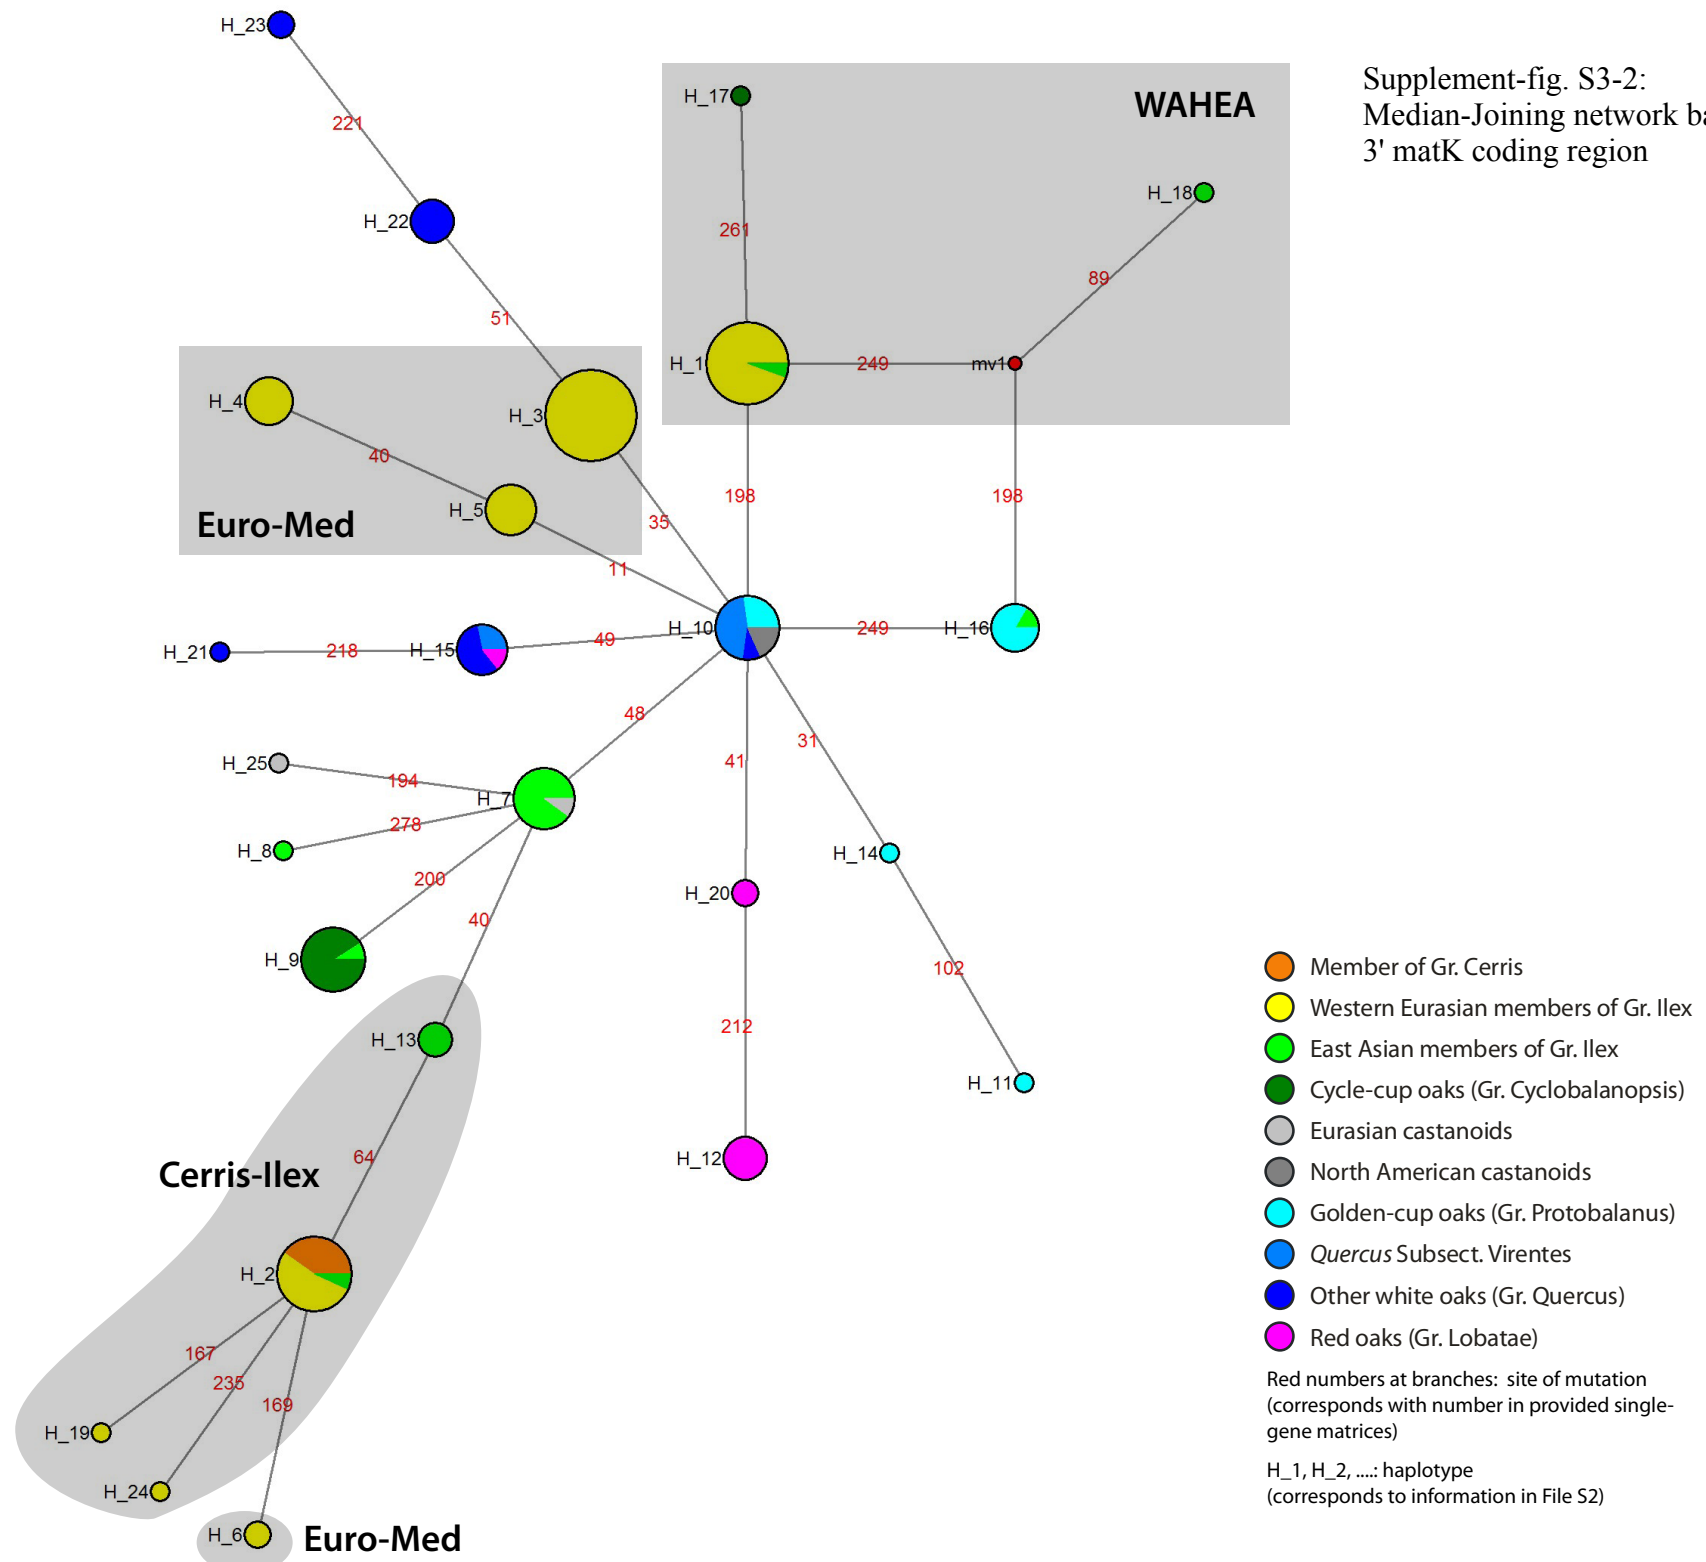

Supplement-fig. S3-3:  
Median-Joining network based on  
3' trnK intron

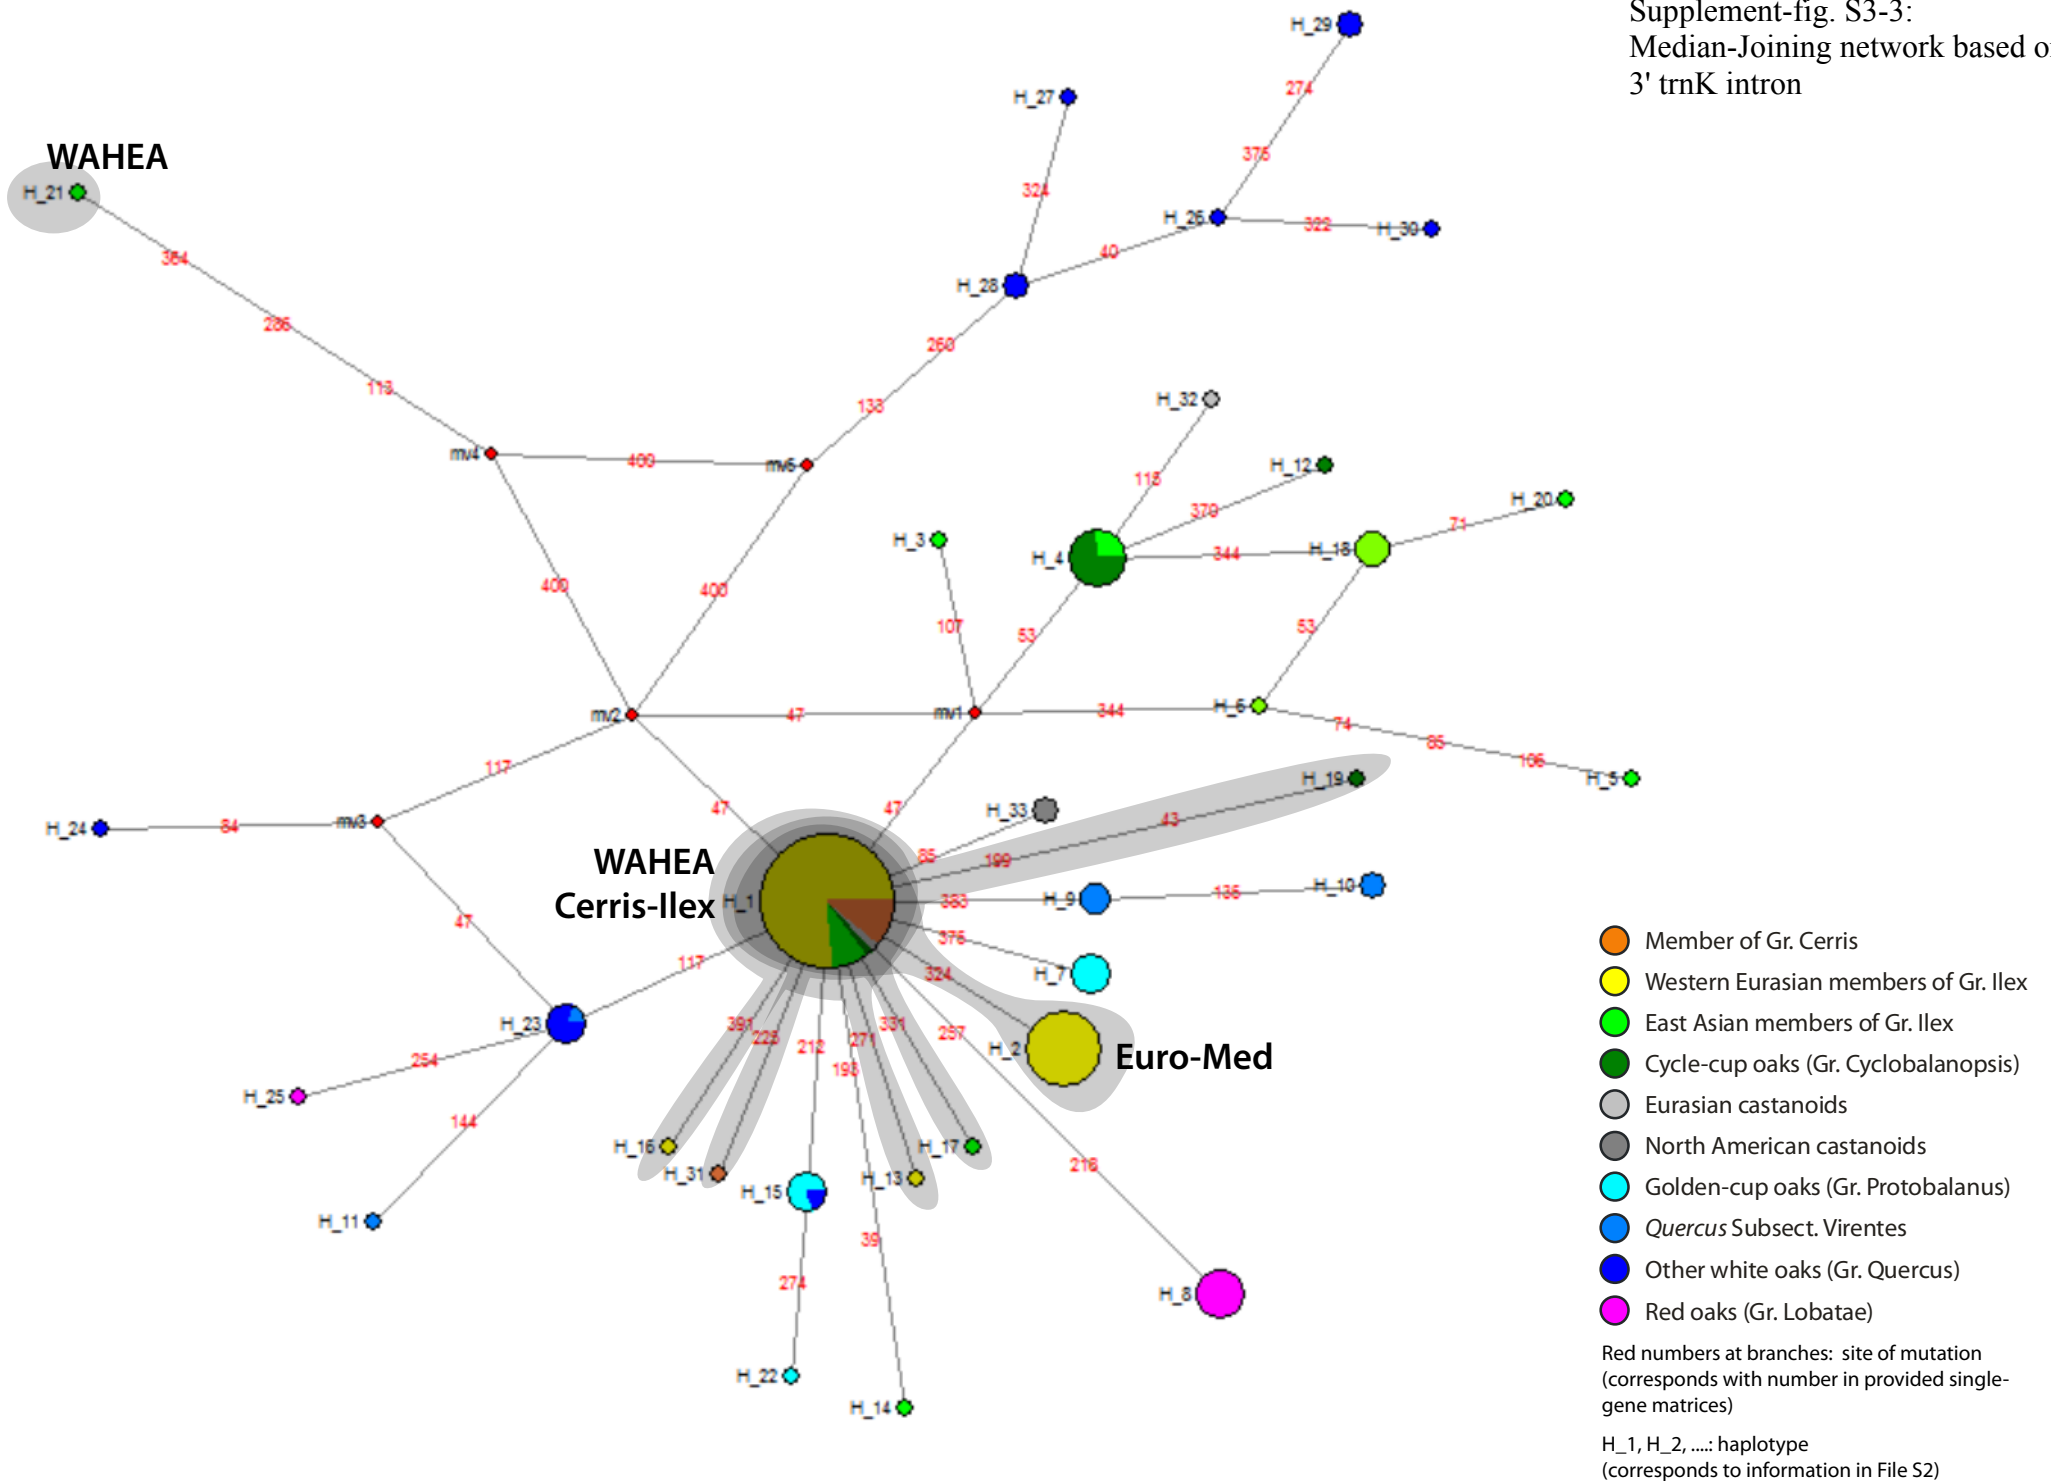

Supplement-fig. S3-4:  
Median-Joining network based on  
the combined matK/trnK strands

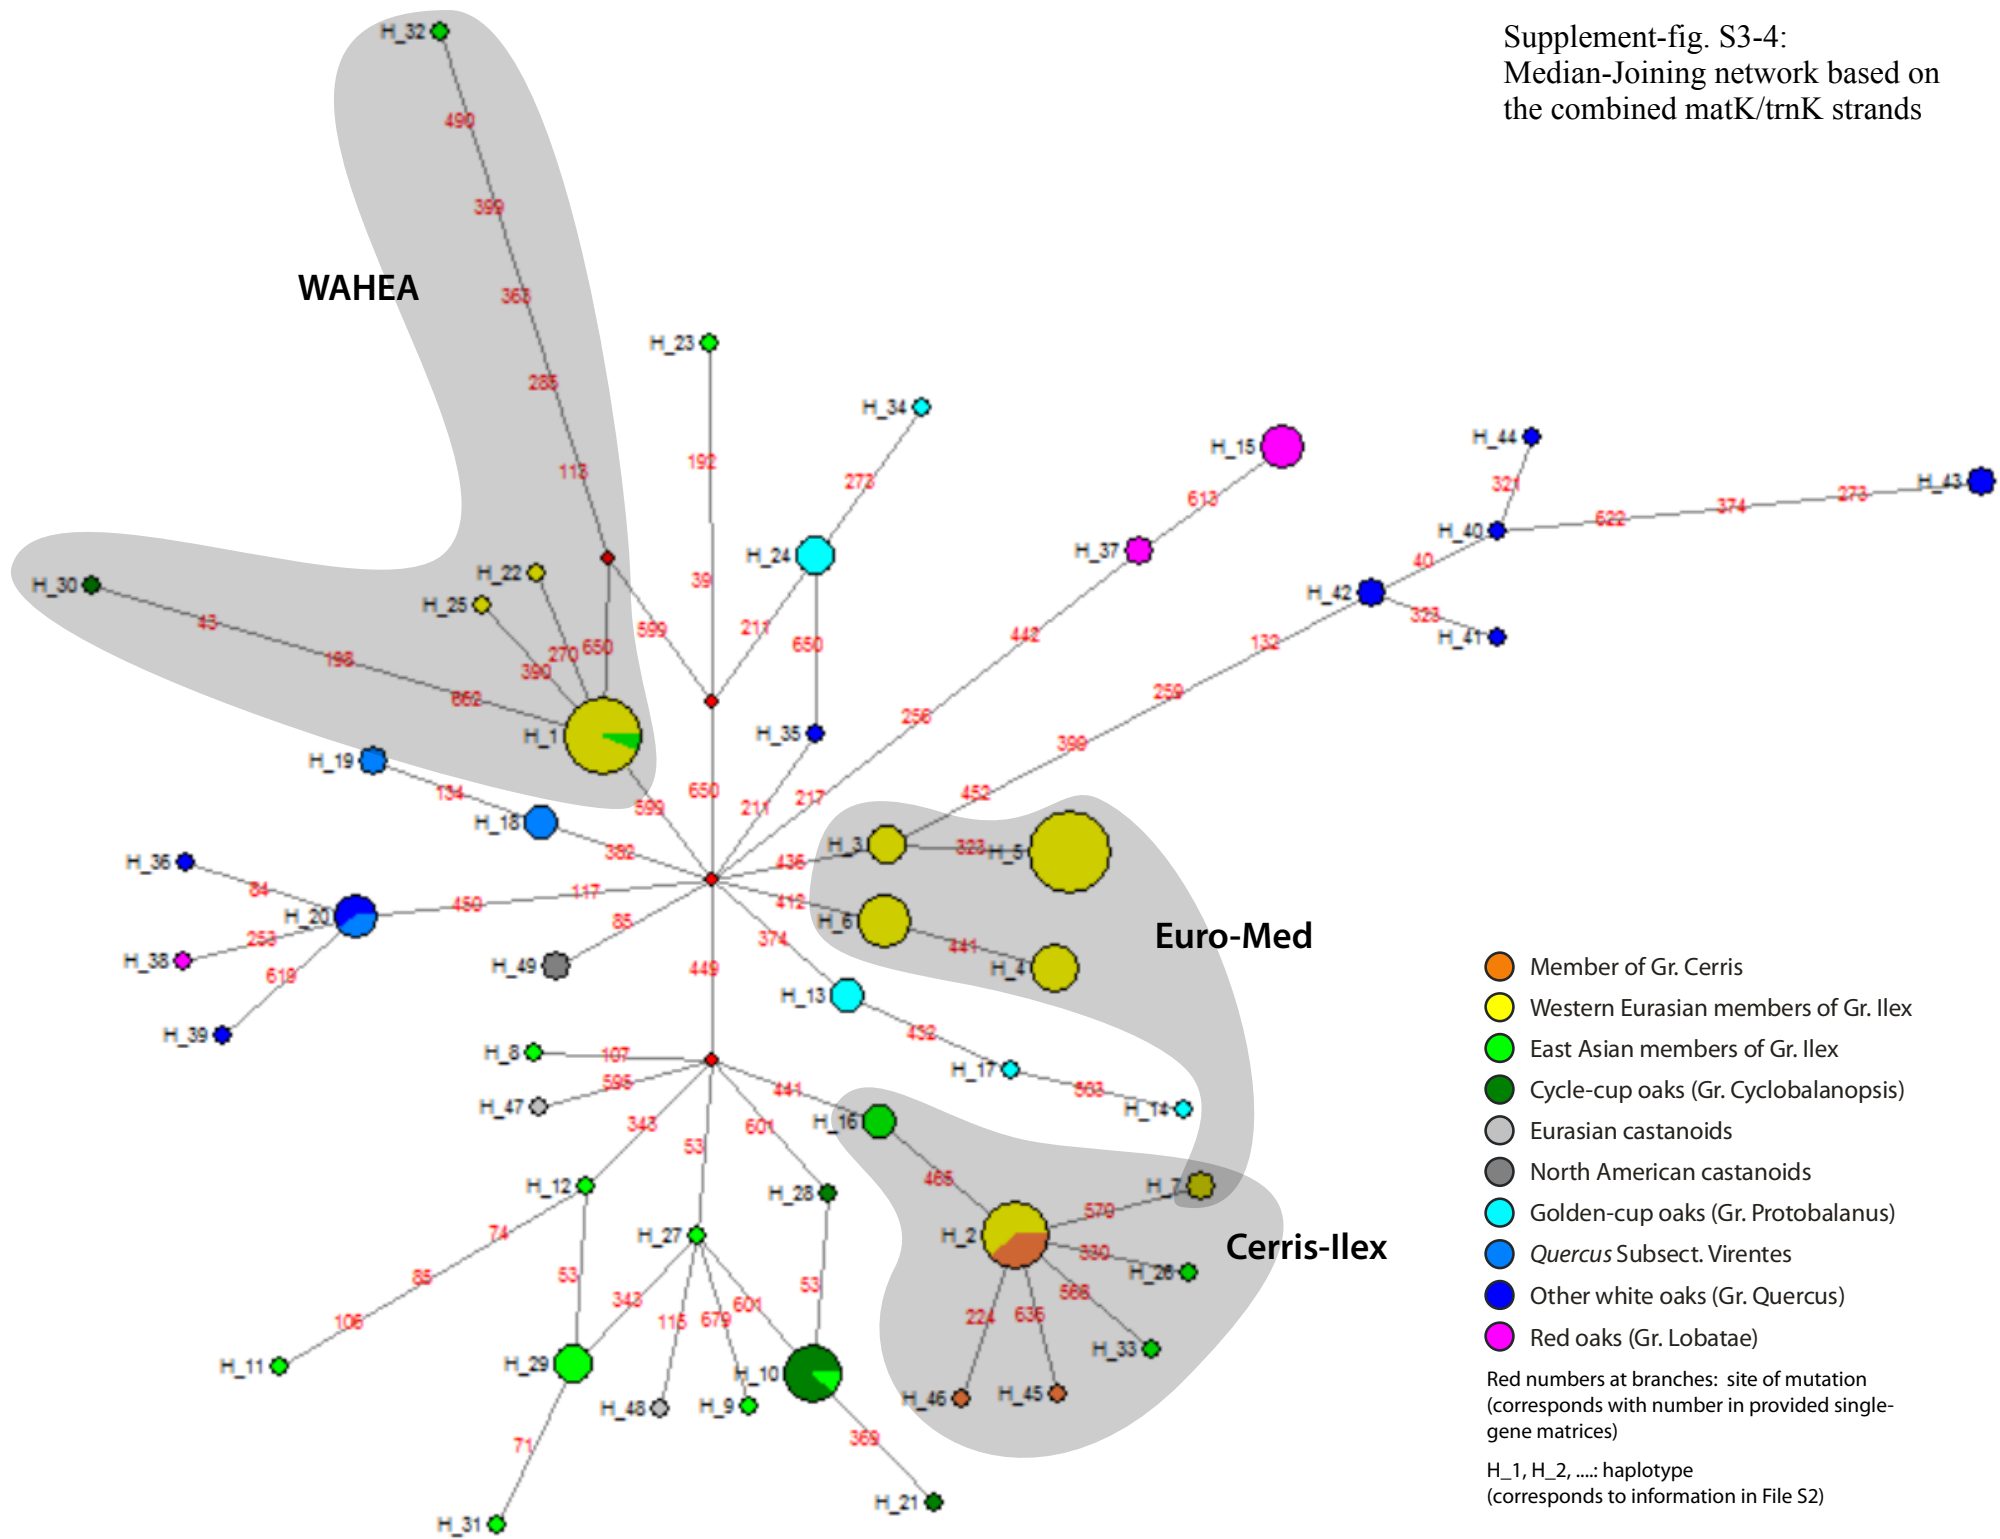

Supplement-fig. S3-5:  
 Median-Joining network based on  
 trnH-psbH spacer (gaps excluded; same  
 basic graph as shown in text-fig. 2)

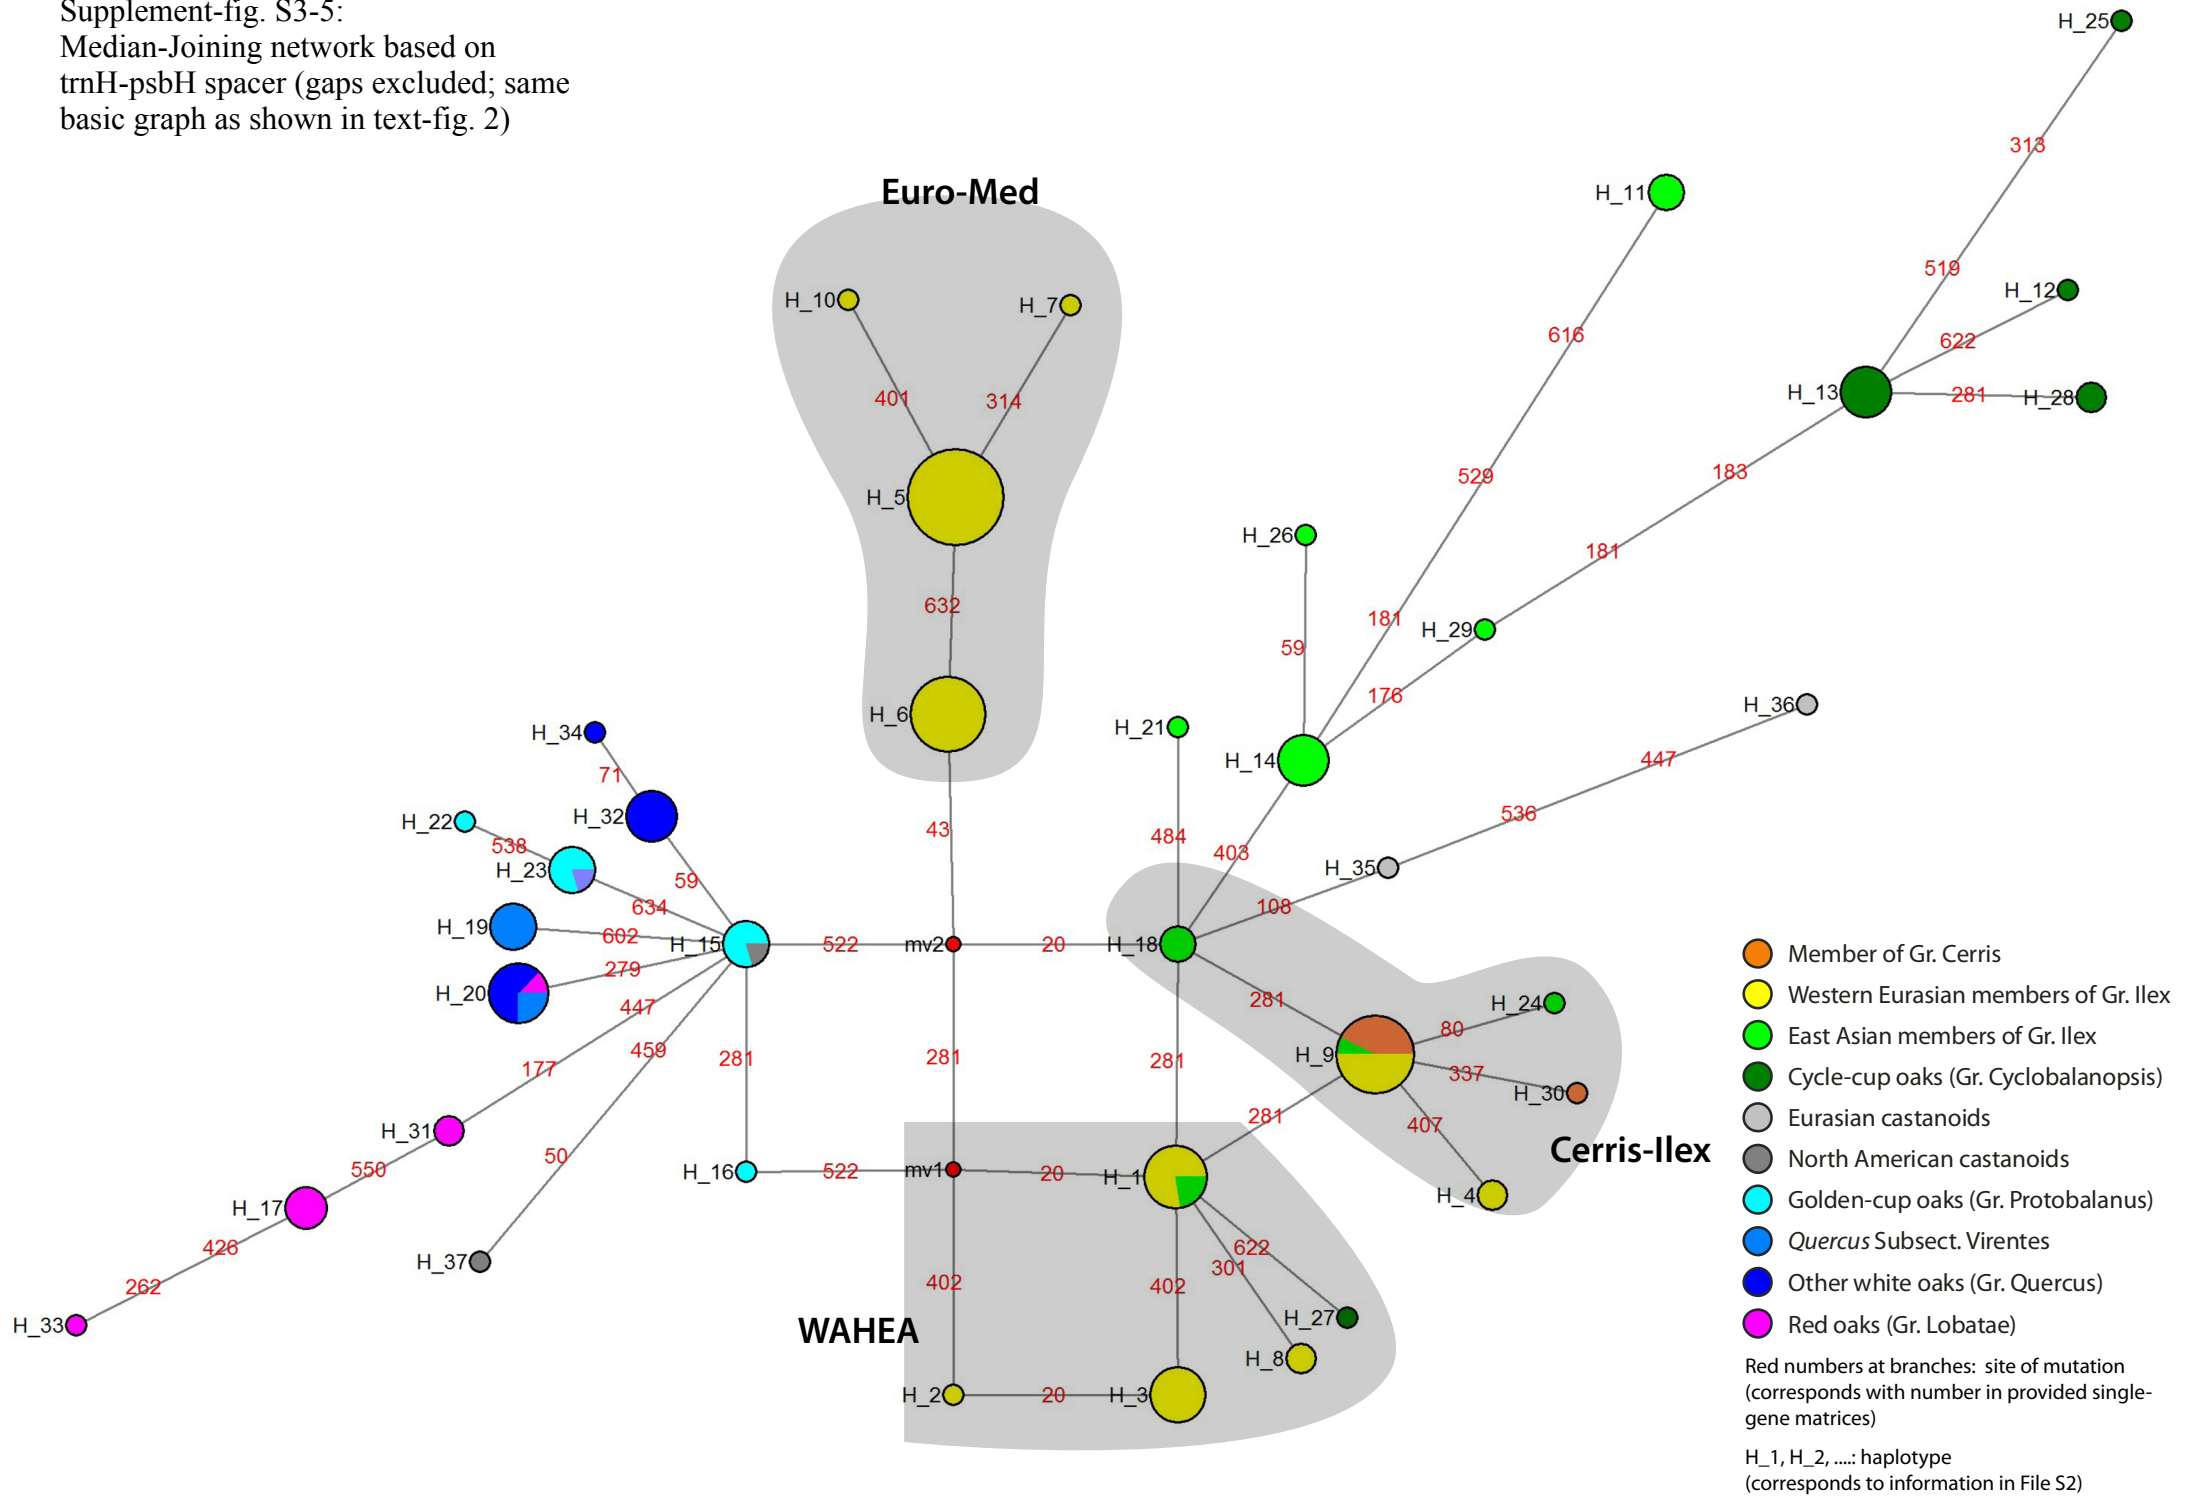

Supplement: FileS3_Haplotype_networks.pdf [file FileS3_Haplotype_networks.pdf]
